# Supplementary material
Source: HighWire-hosted journal article supplement (https://bmjopen.bmj.com/content/8/3/e019878)

**Topic Guide for in-depth Interview: DOTS Facilitator, Facility Level**

**Objectives of the interview:**

- To examine whether the intervention was delivered as intended, including through description of the intervention as delivered
- To assess processes of implementation, including changes over time
- To explore intervention deliverers' responses to and perceptions of the intervention

**Brief participant characteristics questionnaire to be filled in immediately before the interview**

Gender: \_\_\_\_\_

Age: \_\_\_\_\_

How long have you been working at this center/institution? \_\_\_\_\_ years/months

How long have you been working with TB patients? \_\_\_\_\_ years/months

1

---

Site: \_\_\_\_\_

Interviewer: \_\_\_\_\_

Date: \_\_\_\_\_

Time interview starts: \_\_\_\_\_

Time interview completed: \_\_\_\_\_

**Round 1**

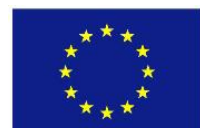

**Welcome and thank you for making time for this interview today.**

**Purpose and Format of the Interview:**

As you are aware, we are conducting an official study in collaboration with the National TB Programme on providing support for people with Tuberculosis (TB) who use tobacco and wish to quit. You have been involved in this study as one of the DOTS facilitators at this facility. You were trained to use the flip book and give your patients advice on quitting tobacco. We would like to ask you some questions about the tobacco cessation service in your facility, and are particularly interested in your views on the behavioural support you delivered to help TB patients quit tobacco. This discussion will take around 45 minutes. We appreciate your time. I would like to record this interview for the project, but will not use your name. If you agree, I will switch on the recorder now. If you wish to stop the interview at any time, just let me know and we will stop without negative consequences for you.

**General experience**

I would like to first ask you about your thoughts on the behaviour support and the project overall.

1. How do you feel about the behaviour support programme?\*

  - How do you feel about the programme being used in your facility?
    - Why do you feel this way?

**Flip book**

To deliver the behaviour support, you were given a brief training and provided with a flip book and some materials, such as the leaflet and posters for the clinic. I would like to ask you about your thoughts on these items.

1. Do you use the flip book with all new TB patients?
  - Can you please describe how you are using the flip book?\*
  - With whom do you use it? Why/why not do you use it with some patients?
  - How do you feel about using the flip book?
    - How do you feel about the images?
    - How do you feel about the texts on the back: too much text, not enough text?
    - How do you feel about the size and dimensions of the book: is it easy to hold and use during a consultation?
  - How do you feel about the general health messages and TB advice in the flip book?
    - What is the reason for this?
  - How do you feel about the tobacco cessation messages in the flip book?
    - What is the reason for this?
2. How have patients responded to the flip book and the TB health messages?\*

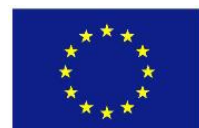

- Are there any differences between men and women?
  - Are there any differences between patients from different backgrounds?
    - Rural/urban
    - Highly educated, not well educated
    - with different occupations
    - different castes/class/backgrounds
    - religion
    - of different age
    - with different illnesses other than TB (*pre-existing conditions*)
      - specific illnesses: who are hearing/visually impaired
3. How are you using the materials with patients who are illiterate?\*
- Can you describe what you do and say differently – if at all – from your other patients?
    - Do you use the flip book differently with men or women who cannot read?
    - Do you use it differently with people of different backgrounds who cannot read?

### Perceived usefulness/effectiveness

Let us talk a bit more about tobacco and TB patients.

4. Do you always ask patients about their tobacco use during the counselling session?\*
- Why/why not do you ask certain patients?
5. When do you ask patients about their tobacco use?
- How do you feel about asking TB patients about their tobacco use?
  - Does this differ between asking men and women?
  - Do you feel differently asking patients from different backgrounds?
    - Rural/urban
    - Highly educated, not well educated
    - with different occupations
    - different castes/class/backgrounds
    - religion
    - of different age
    - with different illnesses other than TB (*pre-existing conditions*)
  - How do you feel about speaking about tobacco yourself?
6. How have patients responded specifically to the tobacco information and advice you gave?\*
- Are there any differences between men and women?
  - Are there any differences between patients from different backgrounds?
    - Rural/urban
    - Highly educated, not well educated

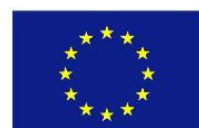

- with different occupations
- different castes/class/backgrounds
- religion
- of different age
- with different illnesses other than TB (*pre-existing conditions*)
- Who would respond in this way?
  - Why would they respond in this way?
- What have patients said about potential difficulties stopping tobacco?
 

What were they worried about?

  - tobacco use in their families,
  - among their friends,
  - at work,
  - in social situations
  - afraid of quitting or side effects
  - not knowing how to quit
  - Who has spoken about difficulties, and why do you think they responded this way?
    - Are there differences between people of different
      - Gender
      - Rural/urban
      - Highly educated, not well educated
      - with different occupations
      - religion
      - different castes/class/backgrounds
      - of different age
      - with different illnesses other than TB (*pre-existing conditions*)

## Leaflet

I would like to come back to the materials we have given you. What are your thoughts on the leaflet and the poster?

7. Do you give the leaflet to all patients during or after your counselling session?
  - Whom do you give it to? Why/why not do you give it to some patients?
 

If not to all patients:

    - Are there differences between people of different backgrounds?
    - Gender
    - Rural/urban
    - Highly educated, not well educated
    - with different occupations
    - religion
    - different castes/class/backgrounds
    - of different age
    - with different illnesses other than TB (*pre-existing conditions*)



8. How do patients react when you offer them the leaflet?
- Are there differences between men and women?
  - Are there differences between people of different backgrounds?
    - Rural/urban
    - Highly educated, not well educated
    - with different occupations
    - religion
    - different castes/class/backgrounds
    - of different age
    - with different illnesses other than TB (*pre-existing conditions*)
  - Which persons responded in this way to the leaflet?
  - Why do you think they respond in this way?
9. How do you use the leaflet with patients who cannot read?
- Do you explain the pictures?
  - Read leaflet to them?
  - Ask them to show to somebody to read at home?
  - Not give out leaflet at all to those patients?
  - Do you use the leaflet differently with men or women who cannot read?
  - Do you use it differently with people of different backgrounds who cannot read?
    - Rural/urban
    - Highly educated, not well educated
    - with different occupations
    - religion
    - different castes/class/backgrounds
    - of different age
    - with different illnesses other than TB (*pre-existing conditions*)
10. How do you feel about the leaflet and its messages?
- Why do you feel this way?

### Poster

11. Is there a poster in your facility advertising the cessation services? (if yes, probe with question #12)
12. How do you feel about the poster and its messages?
- Why do you feel this way?
13. Do patients talk to you about the poster?
- Have you shown patients the poster/talked to patients about the poster?
  - Who talked to you about the poster? People of different



- Gender
- Rural/urban
- Highly educated, not well educated
- with different occupations
- religion
- different castes/class/backgrounds
- of different age
- with different illnesses other than TB (*pre-existing conditions*)?

## COM-B related

I would now like to ask you a few questions on the training on flipbook and counselling you were offered by the TB&Tobacco project before starting this project and giving the TB & tobacco advice.

14. How do you feel about the training you received in delivering the behaviour support?
- What kinds of information and materials have been made available to you? Did it help you to improve your knowledge and skills about delivering tobacco cessation support?
    - How specifically did it help/which aspects of it helped?
  - Do you feel the need for any additional training on knowledge or skills?
    - If yes, what training would you like to receive?
    - Why would you like to receive this particular training?

6

---

## Context

The programme on tobacco cessation takes place at your clinic. I would like to ask you some questions about your work environment and your work day in the clinic.

15. Have you asked any colleagues to also deliver the behaviour support, e.g. when you can't come to work?
- If yes: could you please give us their names so we can interview them as well?
  - Have you given the project materials (flip book/leaflets/training materials) to these colleagues?
16. How do you feel about delivering the programme as part of your work day/routine?\*
- Why do you feel this way?
  - What about
    - Time
    - Space
    - Privacy
    - Supervisors/in-charge support
    - Length of flip book session
  - Can you please describe how you integrate the flip book session into your daily routine?



- What changes in your daily practice, if any, do you plan on making in the next few months while you are delivering this behaviour support?
17. The programme is intended to support TB patients who wish to stop using tobacco. What do you think might affect a patient's ability to quit tobacco?\*
- How about
- other family members' tobacco habits,
  - price of tobacco products,
  - where tobacco is sold (nearby),
  - exposure to second hand tobacco at work, inside their home
  - Does this differ for men and women?
  - Does this differ for patients of different backgrounds?
    - Rural/urban
    - Highly educated, not well educated
    - with different occupations
    - religion
    - different castes/class/backgrounds
    - of different age
    - with different illnesses other than TB (*pre-existing conditions*)
18. Looking forward, what do you feel is needed to make tobacco cessation easier for patients?
- Is this the same for all patients, or does it differ for patients from different backgrounds?
    - gender
    - Rural/urban
    - Highly educated, not well educated
    - with different occupations
    - religion
    - different castes/class/backgrounds
    - of different age
    - with different illnesses other than TB (*pre-existing conditions*)
19. Is there anything else you'd like to say?

**Briefly summarize main points, get feedback on whether you captured the key points and clarify anything you are unsure of.**

Thank you very much for your time today. This is the end of our discussion. I will now turn off the recorder.



Supplement: inline-supplementary-material-1 [file inline-supplementary-material-1.pdf]
